# Supplementary material for: The synergy of host–guest nonfullerene acceptors enables 16%-efficiency polymer solar cells with increased open-circuit voltage and fill-factor
Source: Royal Society of Chemistry journal article supplement (doi:10.1039/c9mh00844f), 2019-01-01
Supplement: c9mh00844f1.pdf [file c9mh00844f1.pdf]

## Supporting Information

# **The Synergy of Host-Guest Nonfullerene Acceptors Enables 16%-Efficiency Polymer Solar Cells with Increased Open-Circuit Voltage and Fill-Factor**

Yuan Chang,<sup>a,b,c</sup> Tsz-Ki Lau,<sup>d</sup> Ming-Ao Pan,<sup>a,b,c</sup> Xinhui Lu,<sup>\*d</sup> He Yan,<sup>\*c</sup> and  
Chuanlang Zhan<sup>\*a,b</sup>

<sup>a</sup> College of Chemistry and Environmental Science, Inner Mongolia Normal University,  
Huhhot 010022, China.

<sup>b</sup> Beijing National Laboratory for Molecular Sciences, CAS key Laboratory of  
Photochemistry, Institute of Chemistry, Chinese Academy of Sciences, Beijing 100190, China.

<sup>c</sup> Department of Chemistry, The Hong Kong University of Science and Technology, Clear Water Bay,  
Kowloon, Hong Kong, China.

<sup>d</sup> Department of Physics, Chinese University of Hong Kong, New Territories, Hong Kong, China.

\* E-mail: clzhan@iccas.ac.cn (C.Z.), hyan@ust.hk (H.Y.), xinhui.lu@cuhk.edu.hk (X.L.)

## **Materials, methods, and characterizations**

**Materials.** The materials of PBDB-T-SF, IT-4F, Y6, ITCT, PEDOT:PSS and PDINO were purchased from Solarmer company.

**UV-Vis absorption spectra.** Absorption spectra of donor polymers and acceptors in solid thin films were prepared by spin-coating their solutions atop the quartz glass substrates and measured on a Hitachi U-3010 UV–vis spectrophotometer.

**Cyclic voltammetry measurements.** For CV experiments, the compound was fully dissolved in N<sub>2</sub>-degassed anhydrous CHCl<sub>3</sub> with a concentration of 10<sup>-4</sup> M and then the solution was deposited onto the work electrode surface to form a thin solid film. CV traces were measured on an electrochemical workstation (CHI 660) at a scan rate of 50 mV/s using tetrabutylammonium tetrafluoroborate (Bu<sub>4</sub>NBF<sub>4</sub>) as the supporting electrolyte. A glassy carbon electrode, a Pt wire and an Ag/AgCl electrode were used as the working, counter and reference electrodes, respectively.

**AFM characterizations.** The AFM images were recorded using a Bruker multimode 8 AFM.

**TFM characterizations.** TEM experiments were performed on a JEM-2100 transmission electron microscope operated at 200 kV. For TEM experiments, the films were obtained by transferring the floated blend films from the water onto the Cu grid.

**Solar cell fabrications and characterizations.** Devices were fabricated on the Indium tin oxide (ITO) patterned glass with a conventional configuration of ITO/PEDOT:PSS/active layers/PDINO/Al. The ITO substrates with a sheet resistance of 10 ohm/square and transmission rate of 90% were firstly cleaned by detergent, deionized water, acetone and isopropanol in turn with sonication for 30 min respectively. The substrates were dried by nitrogen gas and then treated by UV-Ozone for 30 min before use. PEDOT:PSS was spin-coated onto the ITO substrates at 6000 rpm for 30 s, then the substrates were moved to oven and dried at 150°C for 15 min. The PBDB-T-SF:IT-4F:ITCT blends with different weight ratio were dissolved in chlorobenzene (CB) (the concentration of the donor was 7 mg/mL). This solution was stirred at 70°C for about 6 hours. Different ratios of DIO (0.50%, 0.75%, 1.00%) were added into the solution 30 minutes before device fabrication. The blend solution was spin-coated on the top of PEDOT:PSS layer followed by a thermal annealing step (80°C-10 min, 90°C-10 min, 100°C-10 min). The optimal method for active layer was to deposit the solution with 0.75% DIO at 2200 rpm and annealed at 80°C for 10 minutes. The PBDB-T-SF:Y6:ITCT blends with different weight ratio were dissolved in chloroform (CF) (the concentration of the donor was 5.5 mg/mL). This solution was stirred at 60°C for 4 hours. Different ratios of CN (0.25%, 0.50%, 0.75%, 1.00%) were added to the solution before device fabrication. The blend solution was spin-coated on the top of PEDOT:PSS layer followed by a thermal annealing step (80°C-10 min, 90°C-10 min, 100°C-10 min). The optimal method for active layer was to deposit the solution with 0.50% CN at 3000 rpm and annealed at 80°C for 10 minutes.

Atop the active layer, a thin electron transporting layer of PDINO (1.0 mg/mL in methanol, 3000 rpm for 30 s, about 15 nm) was spin-coated. Finally, the Al electrodes were thermally deposited on the top of devices, the thickness of which was about 90 nm. The current density-voltage (J-V) curves were measured in a nitrogen glove box and were conducted on a computer-controlled Keithley 2400 source measure unit under AM 1.5G (calibrated to be 100 mW/cm<sup>2</sup> with a reference silicon cell) using a solar illumination (AAA grade, XES-70S1). The EQE measurements were performed with the as-fabricated solar cell using a QE-R3011 instrument (Enli Technology Co. Ltd., Taiwan).

**SCLC measurements.** The electron and hole mobilities were measured by using the method called space-charge limited current (SCLC) for electron-only and hole-only devices. The structure of electron-only devices was ITO/titanium (diisopropoxide) bis(2,4-pentanedionate) (TIPD)<sup>1</sup>/active layer/PDINO/Al and the hole-only devices were fabricated with the structure of ITO/PEDOT:PSS/active layer/Au. The charge carrier mobility was determined by fitting the dark current to the model of a single carrier SCLC according to the Mott–Gurney law:  $J = 9\varepsilon_0\varepsilon_r\mu V^2/8L^3$ , where  $J$  is the measured current density,  $L$  is the film thickness of the active layer,  $\mu$  is the mobility of charge carrier,  $\varepsilon_r$  is the relative dielectric constant of the transport medium component, and  $\varepsilon_0$  is the permittivity of vacuum ( $8.85419 \times 10^{-12}$  CV<sup>-1</sup>m<sup>-1</sup>),  $V$  is the difference of applied voltage ( $V_{\text{app}}$ ) and offset voltage ( $V_{\text{BI}}$ ). The mobility of charge carriers can be calculated from the slope of the  $J^{1/2} \sim V$  curves.

**GIWAXS measurements.** GIWAXS data was carried out with a Xeuss 2.0 SAXS/WAXS laboratory beamline using a Cu X-ray source (8.05 keV, 1.54 Å) and Pilatus3R 300K detector. The incidence angle is 0.2°.

## Supporting figures

**Figure S1.** Traces of cyclic voltammetry (CV) of PBDB-T-SF (a), IT-4F (b), Y6 (c), and ITCT (d) with ferrocene used as a reference.

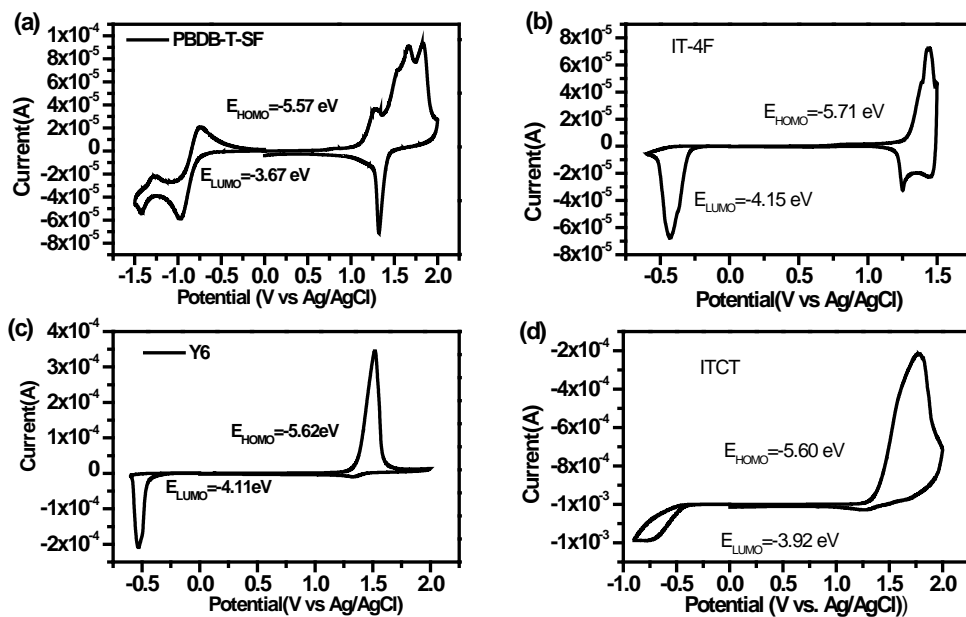

**Figure S2.** Traces of cyclic voltammetry (CV) of the mixtures of Y6:ITCT (a) and IT-4F:ITCT (b) with ferrocene used as a reference.

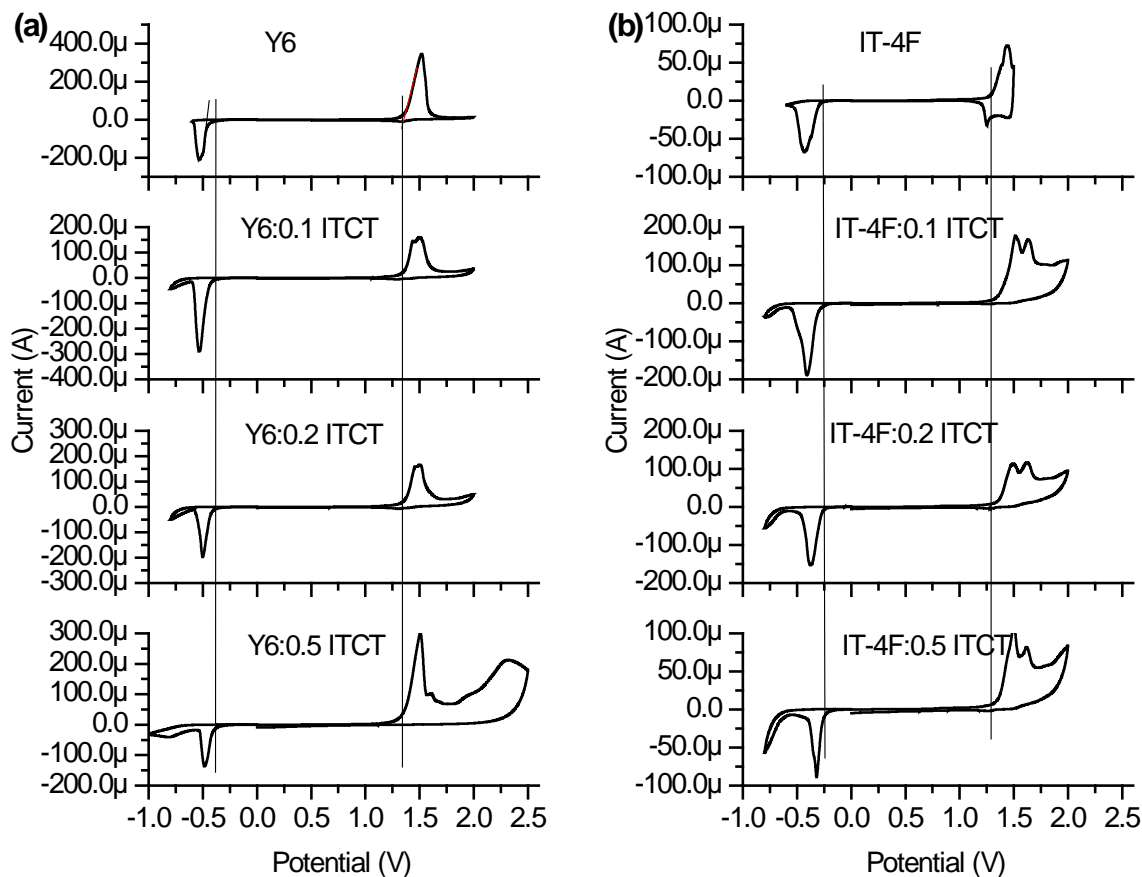

**Figure S3.** Scanning copy of the certificate report of a solar cell device with PBDB-T-SF:Y6:ITCT (1:1.1:0.1) as the active layer and PDINO as the ETL obtained from the National Institute of Metrology (NIM), China.

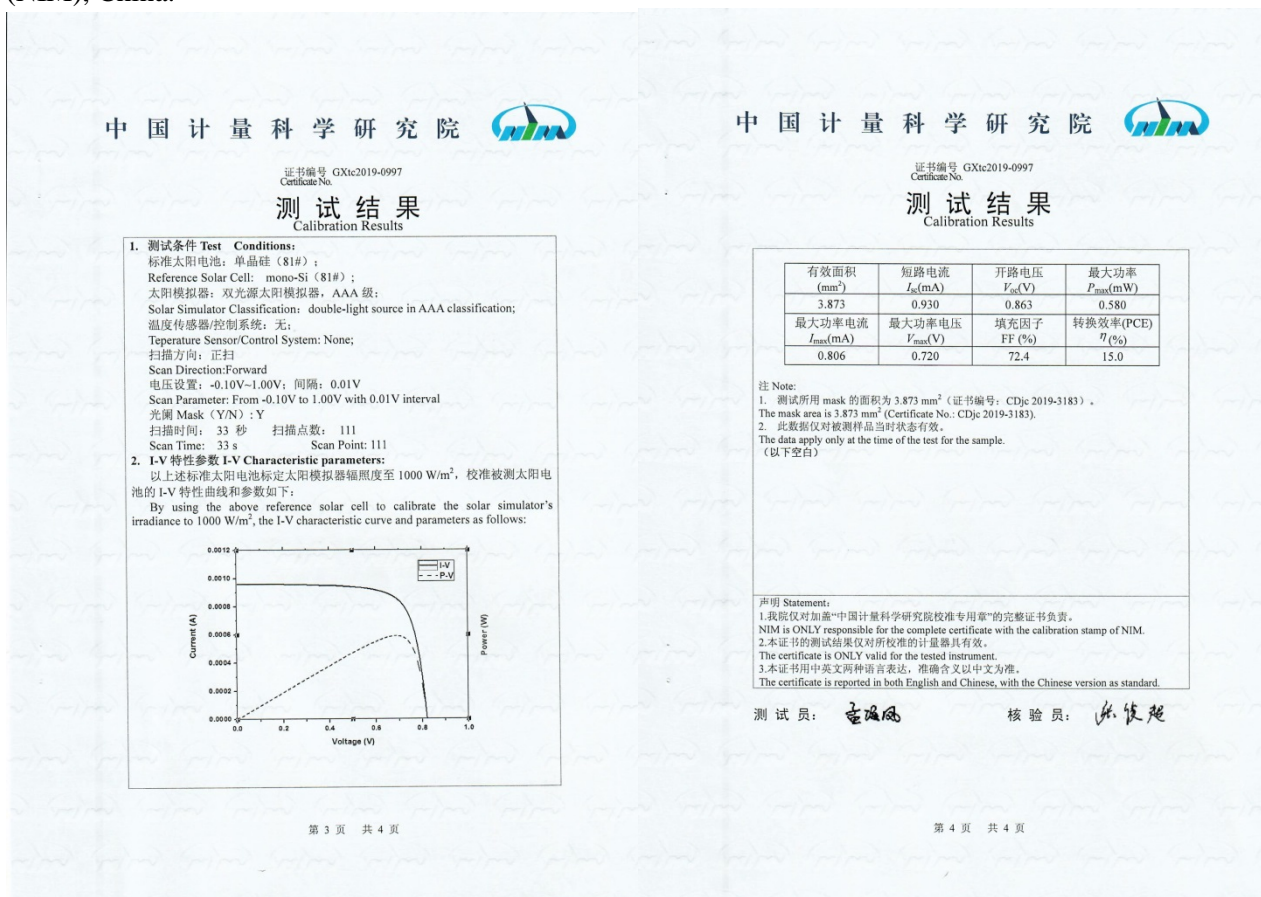

**Figure S4.** The  $J^{0.5} - V$  plots for calculations of the electron (a and c) and hole (b and d) mobilities: IT-4F (a and b) Y6 based (c and d) binary and ternary blends.

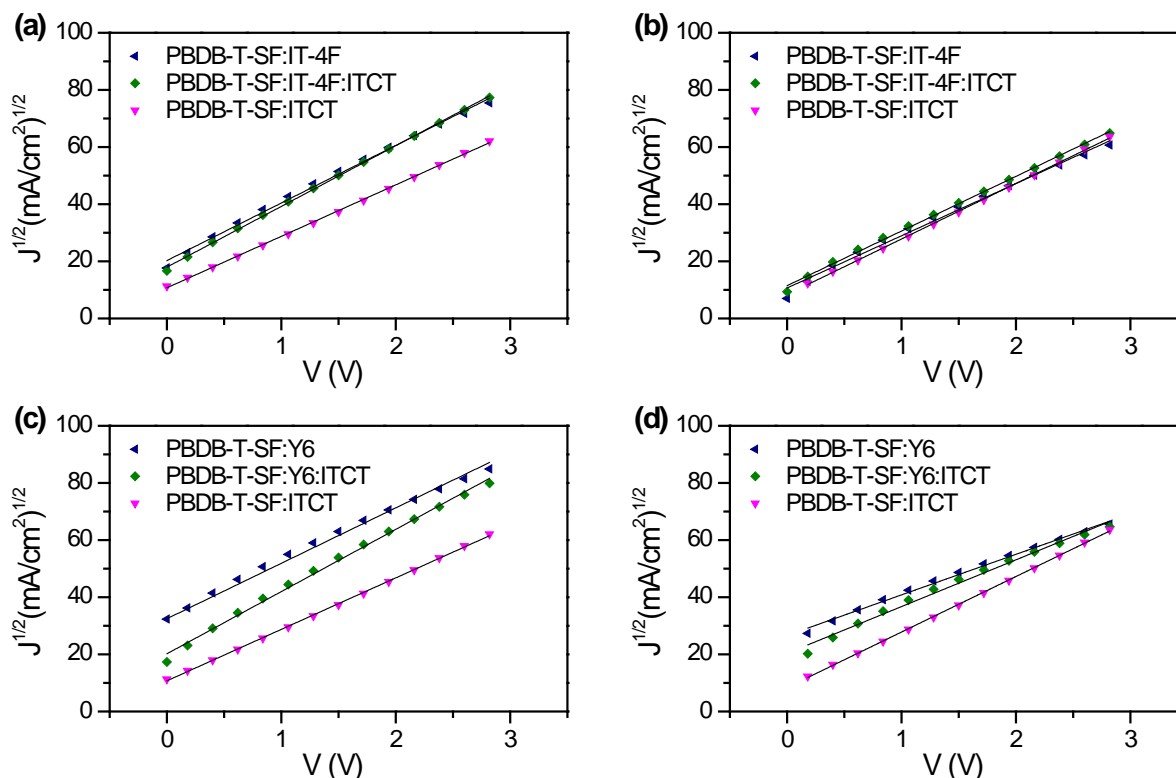

**Figure S5.** The plots of short-circuit current-density ( $J_{sc}$ ) (a and c) and open-circuit voltage ( $V_{oc}$ ) (b and d) vs. light intensity of the optimized binary and ternary devices: The IT-4F based (a and b) and the Y6 based (c and d).

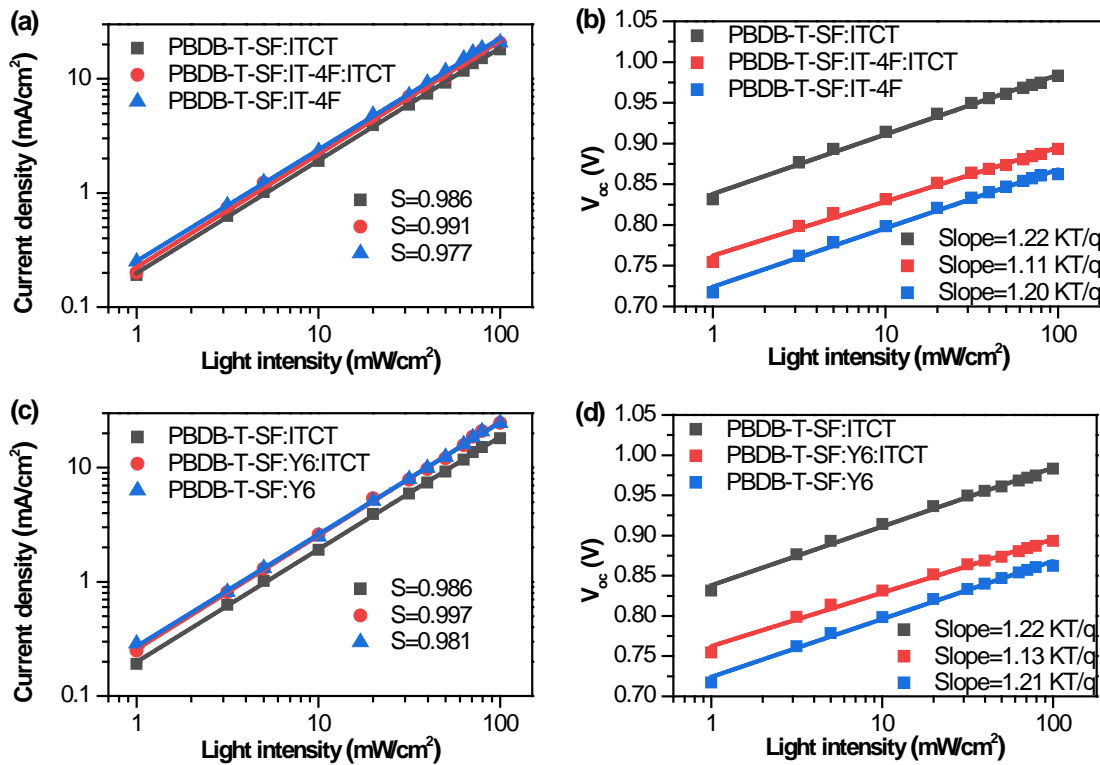

**Figure S6.** Photocurrent-density ( $J_{ph}$ ) – effective voltage ( $V_{eff}$ ) curves of the optimized binary and ternary devices: The IT-4F based (a) and the Y6 based (b).

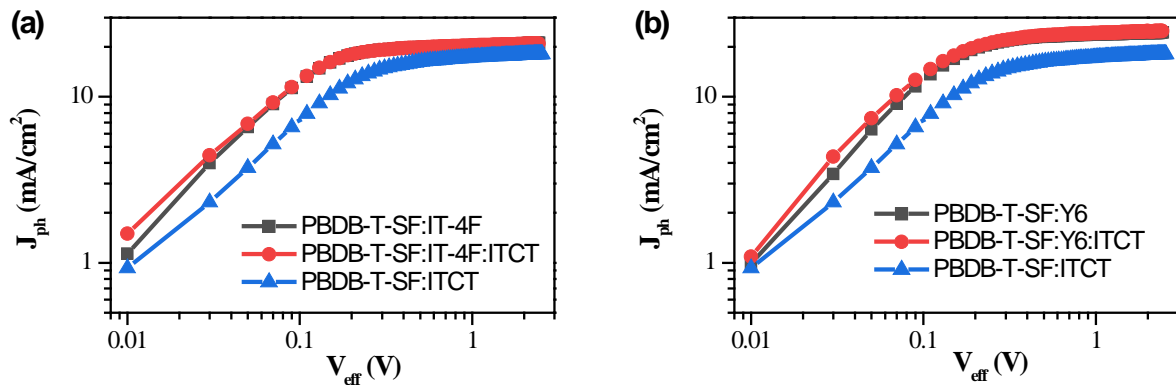

**Figure S7.** 2-D GIWAXS images (a-c) and the linecut profiles (d-f) of the neat ITCT (a and d), PBDB-T-SF (b and e), and Y6 (c and f) films, respectively.

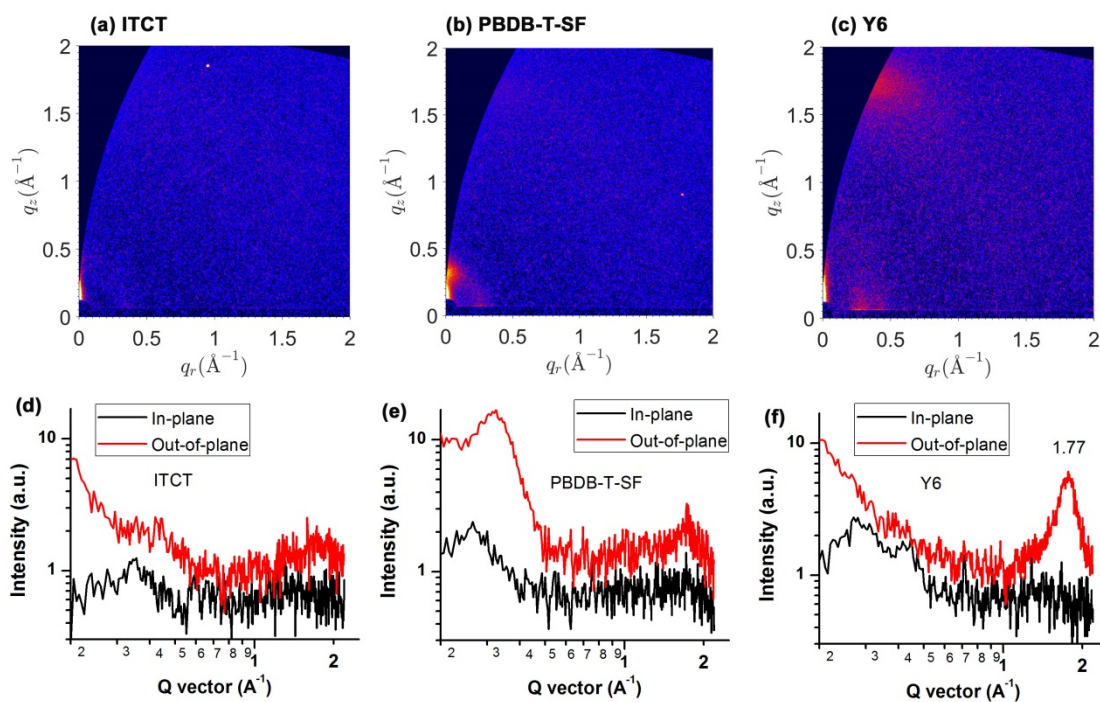

## Supporting Tables

**Table S1. The photovoltaic data of Y6 based binary and ternary solar cells with different optimized conditions.**

| Conditions                 |      | $V_{oc}^a$<br>[V] | $J_{sc}^a$<br>[mA/cm <sup>2</sup> ] | $FF^a$<br>[%]      | $PCE_{ave}^a$<br>[%] |
|----------------------------|------|-------------------|-------------------------------------|--------------------|----------------------|
| CN (%)                     | 0.25 | 0.867 (0.863±0)   | 24.21 (19.06±0.15)                  | 70.16 (69.24±1.58) | 14.73 (14.41±0.24)   |
|                            | 0.50 | 0.864 (0.856±0)   | 24.68 (24.37±0.29)                  | 71.19 (70.75±1.38) | 15.18 (14.96±0.22)   |
|                            | 0.75 | 0.852 (0.847±0)   | 23.48 (19.69±0.21)                  | 72.05 (71.84±1.36) | 14.41 (14.15±0.17)   |
| Annealing temperature (°C) | 80   | 0.869 (0.862±0)   | 24.14 (24.00±0.17)                  | 69.98 (69.25±1.45) | 14.68 (14.39±0.20)   |
|                            | 90   | 0.864 (0.856±0)   | 24.68 (24.37±0.29)                  | 71.19 (70.75±1.38) | 15.18 (14.96±0.22)   |
|                            | 100  | 0.861 (0.855±0)   | 24.36 (24.14±0.14)                  | 70.89 (70.27±1.42) | 14.87(14.55±0.25)    |
| Spin coating speed (rpm)   | 2700 | 0.860 (0.854±0)   | 25.14 (24.92±0.28)                  | 70.13 (69.57±1.42) | 15.16 (15.01±0.14)   |
|                            | 3000 | 0.864 (0.856±0)   | 24.68 (24.37±0.29)                  | 71.19 (70.75±1.38) | 15.18 (14.96±0.22)   |
|                            | 3300 | 0.867 (0.864±0)   | 24.16 (23.85±0.34)                  | 71.35 (70.88±1.27) | 14.95 (14.72±0.20)   |

  

| Conditions                 |           | $V_{oc}^a$<br>[V] | $J_{sc}^a$<br>[mA/cm <sup>2</sup> ] | $FF^a$<br>[%]      | $PCE_{ave}^a$<br>[%] |
|----------------------------|-----------|-------------------|-------------------------------------|--------------------|----------------------|
| D:A ratio                  | 1:1.2:0   | 0.864 (0.856±0)   | 24.68 (24.37±0.29)                  | 71.19 (70.75±1.38) | 15.18 (14.96±0.22)   |
|                            | 1:1.1:0.1 | 0.885 (0.880±0)   | 24.61 (24.21±0.20)                  | 73.67 (72.39±1.42) | 16.04 (15.83±0.18)   |
|                            | 1:1.0:0.2 | 0.897 (0.891±0)   | 23.49 (23.14±0.27)                  | 71.46 (70.46±1.63) | 15.06 (14.79±0.17)   |
|                            | 1:0.9:0.3 | 0.907 (0.901±0)   | 23.01 (22.25±0.22)                  | 68.95 (67.97±1.58) | 14.39 (14.07±0.21)   |
|                            | 1:0:1     | 0.981 (0.979±0)   | 18.11 (17.79±0.28)                  | 61.45 (60.05±1.36) | 10.92 (10.53±0.18)   |
| CN (%)                     | 0.25      | 0.887 (0.892±0)   | 23.95 (23.54±0.21)                  | 71.46 (70.89±1.45) | 15.18 (14.87±0.28)   |
|                            | 0.50      | 0.885 (0.880±0)   | 24.61 (24.21±0.20)                  | 73.67 (72.39±1.42) | 16.04 (15.83±0.18)   |
|                            | 0.75      | 0.881 (0.878±0)   | 23.46 (23.11±0.15)                  | 72.37 (71.69±1.84) | 14.96 (14.58±0.31)   |
| Annealing temperature (°C) | 70        | 0.891 (0.886±0)   | 24.23 (23.95±0.19)                  | 71.15 (70.85±1.34) | 15.36 (15.04±0.32)   |
|                            | 80        | 0.885 (0.880±0)   | 24.61 (24.21±0.20)                  | 73.67 (72.39±1.42) | 16.04 (15.83±0.18)   |
|                            | 90        | 0.879 (0.872±0)   | 24.04 (23.78±0.23)                  | 73.39 (72.17±1.65) | 15.51 (15.39±0.26)   |
| Spin coating speed (rpm)   | 2700      | 0.880 (0.876±0)   | 25.01 (24.72±0.18)                  | 71.47 (70.84±1.38) | 15.72 (15.42±0.34)   |
|                            | 3000      | 0.885 (0.880±0)   | 24.61 (24.21±0.20)                  | 73.67 (72.39±1.42) | 16.04 (15.83±0.18)   |
|                            | 3300      | 0.889 (0.884±0)   | 23.96 (23.78±0.17)                  | 73.95 (73.11±1.57) | 15.75 (15.53±0.21)   |



**Table S2. The photovoltaic data of IT-4F based binary and ternary solar cells with different optimized conditions.**

| Conditions                    |      | $V_{oc}^a$<br>[V] | $J_{sc}^a$<br>[mA/cm <sup>2</sup> ] | $FF^a$<br>[%]      | $PCE_{ave}^a$<br>[%] |
|-------------------------------|------|-------------------|-------------------------------------|--------------------|----------------------|
| DIO(%)                        | 0.25 | 0.868 (0.863±0)   | 19.21 (19.06±0.15)                  | 69.79 (68.56±1.68) | 11.64 (11.51±0.14)   |
|                               | 0.50 | 0.864 (0.858±0)   | 20.10 (19.57±0.19)                  | 73.51 (72.49±1.59) | 13.07 (12.91±0.18)   |
|                               | 0.75 | 0.861 (0.855±0)   | 19.86 (19.69±0.21)                  | 72.46 (71.84±1.36) | 12.09 (11.88±0.09)   |
| Annealing temperature<br>(°C) | 80   | 0.869 (0.864±0)   | 20.27 (20.15±0.08)                  | 71.97 (70.05±1.34) | 12.68 (12.47±0.13)   |
|                               | 90   | 0.864 (0.858±0)   | 20.10 (19.57±0.19)                  | 73.51 (72.49±1.59) | 13.07 (12.91±0.18)   |
|                               | 100  | 0.860 (0.857±0)   | 19.85 (19.64±0.11)                  | 71.46 (70.59±1.21) | 12.20 (12.05±0.19)   |
| Spin coating speed (rpm)      | 2000 | 0.861 (0.856±0)   | 20.51 (20.32±0.08)                  | 71.53 (70.57±1.29) | 12.63 (12.51±0.17)   |
|                               | 2200 | 0.864 (0.858±0)   | 20.10 (19.57±0.19)                  | 73.51 (72.49±1.59) | 13.07 (12.91±0.18)   |
|                               | 2500 | 0.868 (0.861±0)   | 19.76 (19.35±0.14)                  | 74.09 (73.38±1.82) | 12.71 (12.53±0.10)   |

| Conditions                    |           | $V_{oc}^a$<br>[V] | $J_{sc}^a$<br>[mA/cm <sup>2</sup> ] | $FF^a$<br>[%]       | $PCE_{ave}^a$<br>[%] |
|-------------------------------|-----------|-------------------|-------------------------------------|---------------------|----------------------|
| D:A ratio                     | 1:1:0     | 0.864 (0.858±0)   | 20.10 (19.57±0.19)                  | 73.51 (72.49±1.59)  | 12.77(12.31±0.18)    |
|                               | 1:0.9:0.1 | 0.888 (0.882±0)   | 20.19 (19.73±0.21)                  | 76.23 (75.47±1.66)  | 13.67 (13.23±0.26)   |
|                               | 1:0.8:0.2 | 0.908 (0.903±0)   | 19.65 (19.13±0.24)                  | 72.46 (71.89±1.23)  | 12.93 (12.49±0.07)   |
|                               | 1:0.7:0.3 | 0.913 (0.909±0)   | 19.01 (18.67±0.18)                  | 69.95 (68.56±1.46)  | 12.14 (11.79±0.14)   |
|                               | 1:0:1     | 0.981 (0.977±0)   | 18.11 (17.79±0.28)                  | 61.45 (60.05±1.36)  | 10.92 (10.53±0.18)   |
| DIO (%)                       | 0.5       | 0.898(0.892±0)    | 19.95 (19.79±0.19)                  | 72.06 (71.89±1.37)  | 12.91 (12.57±0.08)   |
|                               | 0.75      | 0.888 (0.882±0)   | 20.19 (19.73±0.21)                  | 76.23 (75.47±1.66)  | 13.67 (13.23±0.26)   |
|                               | 1         | 0.884 (0.878±0)   | 19.66 (19.26±0.17)                  | 75..26 (74.39±1.57) | 13.08 (12.88±0.09)   |
| Annealing temperature<br>(°C) | 70        | 0.894 (0.889±0)   | 20.23 (20.05±0.08)                  | 75.07 (74.58±1.25)  | 13.58 (13.23±0.12)   |
|                               | 80        | 0.888 (0.882±0)   | 20.19 (19.73±0.21)                  | 76.23 (75.47±1.66)  | 13.67 (13.23±0.26)   |
|                               | 90        | 0.886 (0.881±0)   | 20.06 (19.74±0.11)                  | 75.99 (74.79±1.32)  | 13.51 (13.35±0.18)   |
| Spin coating speed (rpm)      | 2000      | 0.884 (0.879±0)   | 20.60 (20.52±0.08)                  | 74.67 (73.69±1.39)  | 13.60 (13.31±0.12)   |
|                               | 2200      | 0.888 (0.882±0)   | 20.19 (19.73±0.21)                  | 76.23 (75.47±1.66)  | 13.67 (13.23±0.26)   |
|                               | 2500      | 0.890 (0.884±0)   | 19.86 (19.67±0.14)                  | 76.50 (75.12±1.62)  | 13.52 (13.23±0.10)   |

1. Z. Tan, W. Zhang, Z. Zhang, D. Qian, Y. Huang, J. Hou and Y. Li, *Adv. Mater.*, 2012, **24**, 1476-1481.
